# Supplementary material for: Solar Light-Induced Methylene Blue Removal over TiO2/AC Composites and Photocatalytic Regeneration
Source: MDPI journal article supplement (doi:10.3390/nano11113016), 2021-11-10
Supplement: s1 [file s1]

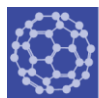

# Solar Light-Induced Methylene Blue Removal over TiO<sub>2</sub>/AC Composites and Photocatalytic Regeneration

Fernanda Dalto <sup>1,†</sup>, Iwona Kuźniarska-Biernacka <sup>1,†</sup>, Clara Pereira <sup>1</sup>, Elsa Mesquita <sup>2</sup>, Olívia Salomé G. P. Soares <sup>3</sup>, M. Fernando R. Pereira <sup>3</sup>, Maria João Rosa <sup>2</sup>, Ana S. Mestre <sup>4,\*</sup>, Ana P. Carvalho <sup>4</sup> and Cristina Freire <sup>1,\*</sup>

<sup>1</sup> REQUIMTE/LAQV, Departamento de Química e Bioquímica, Faculdade de Ciências, Universidade do Porto, Rua do Campo Alegre s/n, 4169-007 Porto, Portugal; up201309985@fc.up.pt (F.D.); iwonakb@fc.up.pt (I.K.-B.); clara.pereira@fc.up.pt (C.P.); acfreire@fc.up.pt (C.F.)

<sup>2</sup> Water Quality and Treatment Laboratory, Urban Water Unit, Hydraulics and Environment Department, LNEC—National Laboratory for Civil Engineering, Av. Brasil 101, 1700-066 Lisboa, Portugal; emesquita@lnec.pt (E.M.); mjrosa@lnec.pt (M.J.R.)

<sup>3</sup> LSRE-LCM, Departamento de Engenharia Química, Faculdade de Engenharia, Universidade do Porto, Rua Dr. Roberto Frias s/n, 4200-465 Porto, Portugal; osgps@fe.up.pt (O.S.G.P.S.); fpereira@fe.up.pt (M.F.R.P.)

<sup>4</sup> Centro de Química Estrutural, Faculdade de Ciências, Universidade de Lisboa, Campo Grande, 1749-016 Lisboa, Portugal; ana.carvalho@fc.ul.pt (A.P.C.); asmestre@fc.ul.pt (A.S.M.)

\* Correspondence: asmestre@fc.ul.pt (A.S.M.); acfreire@fc.up.pt (C.F.)

† These authors contributed equally to this work.

## Adsorption Kinetic Models

The following equation given by Lagergren describes a pseudo-first order model [1]:

$$\log(q_e - q) = \log q_e - k_1 t / 2.303 \quad (\text{S1})$$

In this equation,  $q_e$  and  $q$  are the amounts of MB adsorbed ( $\text{mg g}^{-1}$ ) at the equilibrium time and time  $t$  (min) respectively, and  $k_1$  is the rate constant of sorption ( $\text{min}^{-1}$ ). The rate constant and the corresponding linear regression correlation coefficient values were determined from the straight line plots of  $\log(q_e - q)$  versus  $t$ .

The McKay and Ho, pseudo-second order model [2] based on the equilibrium sorption is expressed by the following equation:

$$\frac{t}{q} = \frac{1}{k_2 q_e^2} + \frac{t}{q_e} \quad (\text{S2})$$

where  $q_e$  and  $q$  represent the amount of MB adsorbed ( $\text{mg g}^{-1}$ ) at the equilibrium and at any time  $t$  (min), respectively, and  $k_2$  is the pseudo-second order rate constant ( $\text{g mg}^{-1} \text{min}^{-1}$ ). The values of  $q_e$  and  $k_2$  were determined from the straight-line plots of  $t/q$  versus  $t$ .

The intra-particle diffusion (Weber-Morris) model [3] is represented by the following equation:

$$q = k_{id} \sqrt{t} + C_i \quad (\text{S3})$$

where  $k_{id}$  is the intra-particle diffusion rate constant ( $\text{mg g}^{-1} \text{min}^{-0.5}$ ).

Based on this model, when the intra-particle diffusion takes part in the sorption process, the plot of  $q$  against  $\sqrt{t}$  is linear. The value of the intercept ( $C$ ) gives an idea about the thickness of the boundary layer i.e., the larger the intercept the higher the boundary layer effect.

The linear form of Elovich equation [4,5] is given as:

$$q = \frac{\ln(a_e b_e)}{b_e} + \frac{1}{b_e} \ln t \quad (\text{S4})$$

where  $a_e$  represents the initial sorption rate constant ( $\text{mg g}^{-1} \text{min}^{-1}$ ) and  $b_e$  is related to the extent of surface coverage and the activation energy for chemisorption ( $\text{g mg}^{-1}$ ). The values of  $a_e$  and  $b_e$  can be computed from the plot of  $q$  versus  $\ln t$ .

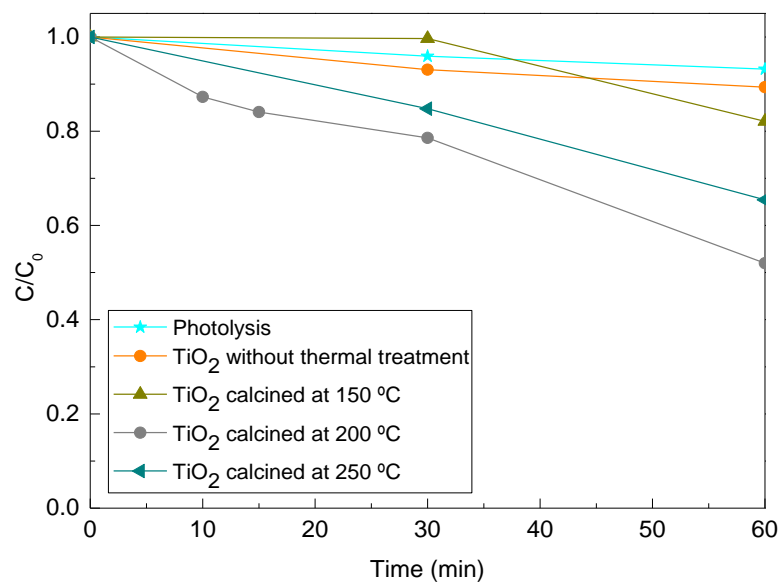

**Figure S1.** Photodegradation of MB solution under simulated solar light and using  $\text{TiO}_2$  not thermally treated, as well as calcined at 150 °C, 200 °C and 250 °C as catalysts. Conditions:  $[\text{MB}] = 25 \text{ mg/L}$ ,  $[\text{Catalyst}] = 0.5 \text{ g/L}$  and  $V_{\text{MB}} = 20 \text{ mL}$ .

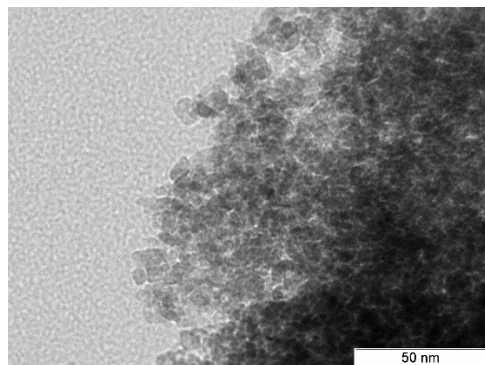

**Figure S2.** TEM image of  $\text{TiO}_2$  sample treated at 200 °C.

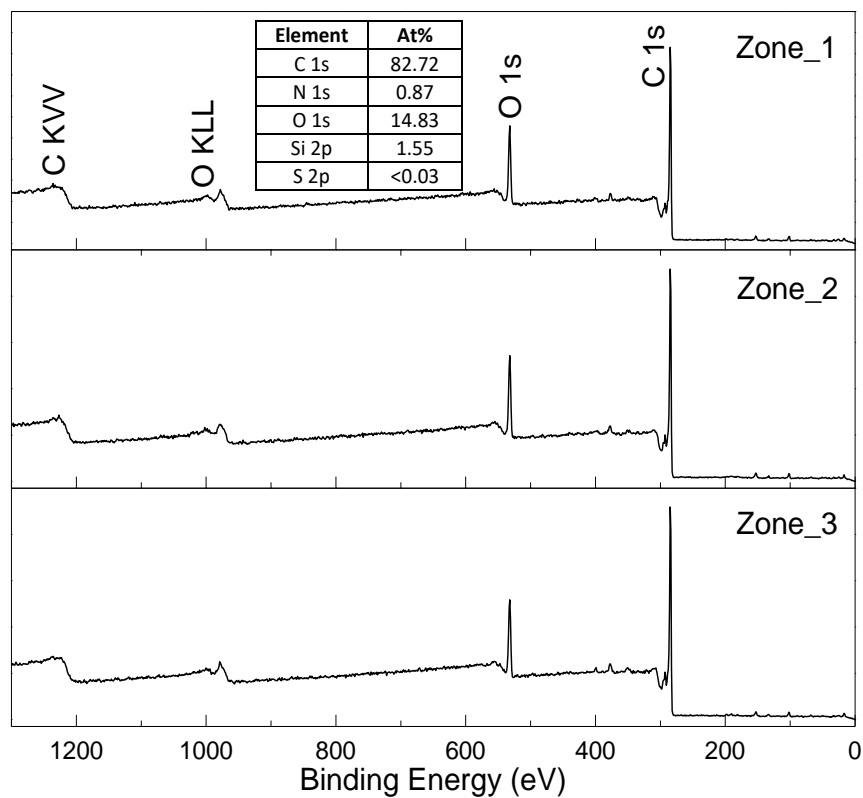

Figure S3. XPS survey spectra of AC taken from three different sample zones.

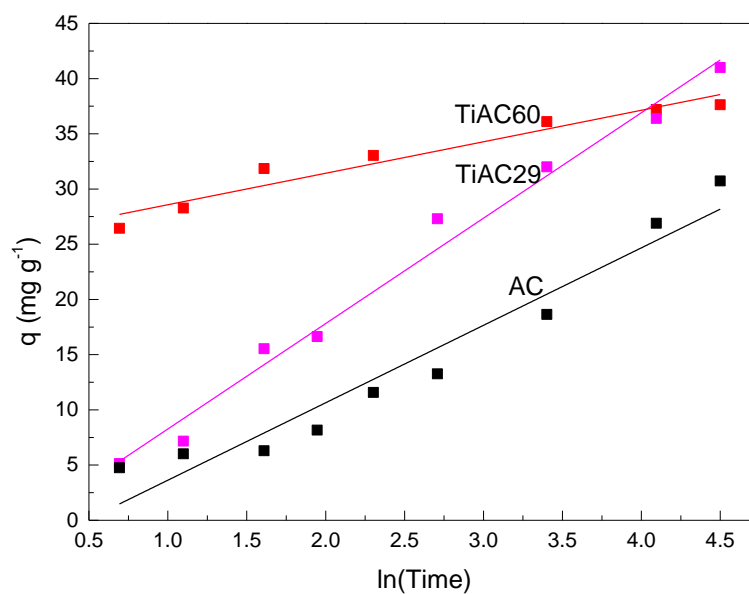

Figure S4. Fitting with Elovich model to the MB adsorption onto TiACX systems and AC.

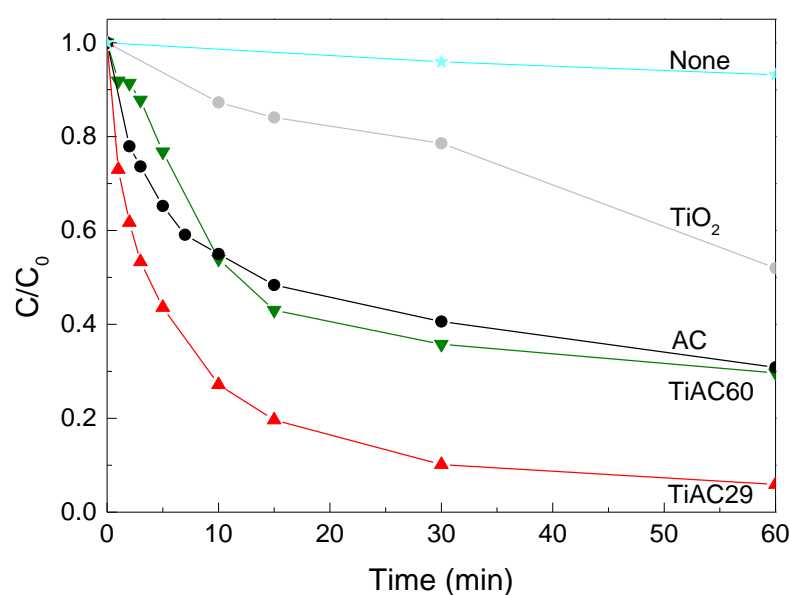

**Figure S5.** Removal of MB solution by onto bare materials and composites under simulated solar light irradiation.

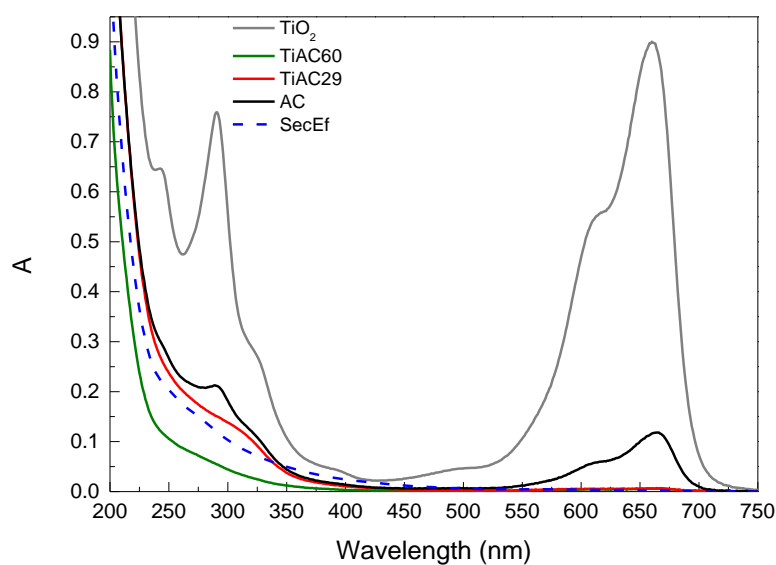

**Figure S6.** Spectra of the SecEf and MB solutions in SecEf after combined adsorption+photocatalysis of SecEf under solar irradiation ([MB] = 25 mg/dm<sup>3</sup> and contact time = 90 min).

## References

1. Lagergren, S. Handlingar. *Band 1898*, 24, 1–39.
2. Ho, Y.S.; McKay, G. Pseudo-second order model for sorption processes. *Process Biochem.* **1999**, 34, 451–465.
3. Cheung, W.H.; Szeto, Y.S.; McKay, G. Intraparticle diffusion processes during acid dye adsorption onto chitosan. *Bioresour. Technol.* **2007**, 98, 2897–2904.
4. Juang, R.-S.; Chen, M.-L. Application of the Elovich Equation to the Kinetics of Metal Sorption with Solvent-Impregnated Resins. *Ind. Eng. Chem. Res.* **1997**, 36, 813–820.
5. Zhang, J.; Stanforth, R. Slow Adsorption Reaction between Arsenic Species and Goethite ( $\alpha$ -FeOOH): Diffusion or Heterogeneous Surface Reaction Control. *Langmuir* **2005**, 21, 2895–2901.
